# Supplementary material
Source: MDPI journal article supplement (https://www.mdpi.com/2673-9976/18/1/76)
Supplement: s1 [file s1]

Archive with 2 entries (2 files):
- POSTER.pdf
- __MACOSX/._POSTER.pdf
